# Supplementary material for: Disrupted Gray Matter Networks Associated with Cognitive Dysfunction in Cerebral Small Vessel Disease
Source: MDPI journal article supplement (doi:10.3390/brainsci13101359), 2023-09-22
Supplement: s1 [file s1]

**Supplementary Table S1.** The 90 cortical and subcortical regions of interest defined in our study.

| Regions                                   | Abbr.     | Regions                                               | Abbr.  |
|-------------------------------------------|-----------|-------------------------------------------------------|--------|
| Precentral gyrus                          | PreCG     | Lingual gyrus                                         | LING   |
| Superior frontal gyrus, dorsolateral      | SFGdor    | Superior occipital gyrus                              | SOG    |
| Superior frontal gyrus, orbital part      | ORBsup    | Middle occipital gyrus                                | MOG    |
| Middle frontal gyrus                      | MFG       | Inferior occipital gyrus                              | IOG    |
| Middle frontal gyrus orbital part         | ORBmid    | Fusiform gyrus                                        | FFG    |
| Inferior frontal gyrus, opercular part    | IFGoperc  | Postcentral gyrus                                     | PoCG   |
| Inferior frontal gyrus, triangular part   | IFGtriang | Superior parietal gyrus                               | SPG    |
| Inferior frontal gyrus, orbital part      | ORBinf    | Inferior parietal, but supramarginal and angular gyri | IPL    |
| Rolandic operculum                        | ROL       | Supramarginal gyrus                                   | SMG    |
| Supplementary motor area                  | SMA       | Angular gyrus                                         | ANG    |
| Olfactory cortex                          | OLF       | Precuneus                                             | PCUN   |
| Superior frontal gyrus, medial            | SFGmed    | Paracentral lobule                                    | PCL    |
| Superior frontal gyrus, medial orbital    | ORBsupmed | Caudate nucleus                                       | CAU    |
| Gyrus rectus                              | REC       | Lenticular nucleus, putamen                           | PUT    |
| Insula                                    | INS       | Lenticular nucleus, pallidum                          | PAL    |
| Anterior cingulate and paracingulate gyri | ACG       | Thalamus                                              | THA    |
| Median cingulate and paracingulate gyri   | DCG       | Heschl gyrus                                          | HES    |
| Posterior cingulate gyrus                 | PCG       | Superior temporal gyrus                               | STG    |
| Hippocampus                               | HIP       | Temporal pole: superior temporal gyrus                | TPOsup |
| Parahippocampal gyrus                     | PHG       | Middle temporal gyrus                                 | MTG    |
| Amygdala                                  | AMYG      | Temporal pole: middle temporal gyrus                  | TPOmid |
| Calcarine fissure and surrounding cortex  | CAL       | Inferior temporal gyrus                               | ITG    |
| Cuneus                                    | CUN       |                                                       |        |

**Supplementary Table S2.** Global and local topological properties used in the study.

| Global network properties                                 |                                                                                                                                                                              |
|-----------------------------------------------------------|------------------------------------------------------------------------------------------------------------------------------------------------------------------------------|
| <b>Global Efficiency <math>E_{glob}</math></b>            | $E_{glob}$ is defined as the mean value of all regions' global efficiency.                                                                                                   |
| <b>Local Efficiency <math>E_{loc}</math></b>              | $E_{loc}$ is defined as the mean value of all regions' local efficiency.                                                                                                     |
| <b>Shortest path length <math>L_p</math></b>              | $L_p$ is defined as the average length of the shortest path between every two nodes in network G, which quantifies the ability for information to be propagated in parallel. |
| <b>Clustering coefficient <math>C_p</math></b>            | $C_p$ is the average clustering coefficient over all nodes, which indicates the extent of local interconnectivity or cliquishness in a network                               |
| <b>Normalized <math>L_p</math> (<math>\lambda</math>)</b> | $\lambda = L_p^{real} / L_p^{rand}$ , $L_p^{rand}$ is the mean shortest path length of 100 matched random networks.                                                          |
| <b>Normalized <math>C_p</math> (<math>\gamma</math>)</b>  | $\gamma = C_p^{real} / C_p^{rand}$ , $C_p^{rand}$ is the mean clustering coefficient of 100 matched random networks.                                                         |
| <b>Small-worldness <math>\sigma</math></b>                | $\sigma = \lambda / \gamma$ , A real network would be considered small world if $\gamma > 1$ and $\lambda \approx 1$ .                                                       |

---

**Local nodal properties**


---

|                                                    |                                                                                           |
|----------------------------------------------------|-------------------------------------------------------------------------------------------|
| <b>Nodal Betweenness</b>                           | $B_{\text{nodal}}(i)$ is defined as the fraction of all shortest paths in the network     |
| <b>Centrality <math>B_{\text{nodal}}(i)</math></b> | $G$ that pass through a given node $i$ , The mathematical definition is presented in (2). |

---

The mathematical definition of  $B_{\text{nodal}}(i)$  is shown in Equation (2):

$$B_{\text{nodal}}(i) = \sum_{s \neq i \neq t \in G} \frac{e_{st}(i)}{e_{st}}$$

$e_{st}(i)$  denotes the number of shortest paths in network  $G$  between node  $s$  and node  $t$ , which pass through node  $i$ , while  $e_{st}$  denotes the total number of shortest paths in network  $G$  between node  $s$  and node  $t$ .  $B_{\text{nodal}}(i)$  captures the effect of a node on the information flow between all other nodes in a network and is usually used to identify brain network hubs [89]. Node  $i$  was considered a brain hub if  $B_{\text{nodal}}(i)$  was at least 1 standard deviation (SD) greater than the average nodal BC of the network (i.e.,  $B_{\text{nodal}}(i) > \text{mean} + \text{SD}$ ) [41].

**Supplementary Table S3.** Compare with previous similar study

---

| <b>Title</b>   | <b>Disrupted Gray Matter Networks Associated with Cognitive Dysfunction in Cerebral Small Vessel Disease</b>                                                              | <b>Disrupted topological organization of resting-state functional brain networks in cerebral small vessel disease</b>                                                                         |
|----------------|---------------------------------------------------------------------------------------------------------------------------------------------------------------------------|-----------------------------------------------------------------------------------------------------------------------------------------------------------------------------------------------|
| <b>Topic</b>   | Topological changes of brain gray matter (GM) structural network between CSVD-c, CSVD-n and HC                                                                            | Topological changes of brain functional connectivity (fc) network between CSVD-c, CSVD-n and HC                                                                                               |
| <b>Method</b>  | Brain structure networks were constructed by using GM volumetric parameters                                                                                               | Resting-state functional MRI were used to construct individual whole-brain and ROI-level FC networks                                                                                          |
| <b>Results</b> | Both CSVD-c and CSVD-n patients showed increased Eglob/Eloc and decreased Lp in GM structural networks                                                                    | Only CSVD-c patients showed decreased Eglob/Eloc/Cp and increased Lp in functional networks                                                                                                   |
|                | The GM structural networks of CSVD-c patients exhibited significantly altered nodal betweenness centrality (BC) in the DMN and sensorimotor-associated functional regions | The functional networks of CSVD-c patients exhibited significantly altered nodal BC in the DMN and attention, and visual-related functional areas                                             |
|                | Eglob, Eloc and Lp of GM structural networks were significantly correlated with the SDMT score in the CSVD patients                                                       | Altered nodal BC of the right anterior/posterior cingulate gyrus and left cuneus in functional networks were significantly correlated with the clinical cognitive parameters of CSVD patients |

---

In **Supplementary Table S3**, a comparison is made between this study and previous ones. The previous research on functional networks of CSVD patients discovered a notable reduction in both global and local efficiency, as well as a significant increase in the shortest path length. Both studies revealed variations in nodal BC in different brain functional modules in CSVD-c patients. These changes in the brain's topological characteristics are linked to the patients' cognitive and executive functions.

**Supplementary Table S4.** The list of abbreviations

| The list of abbreviations |                                                  |
|---------------------------|--------------------------------------------------|
| Abbreviation              | Full name                                        |
| GM                        | gray matter                                      |
| CSVD                      | cerebral small vessel disease                    |
| CMBs                      | cerebral microbleeds                             |
| CSVD-c                    | CSVD patients with CMBs                          |
| CSVD-n                    | CSVD patients without CMBs                       |
| E <sub>glob</sub>         | global efficiency                                |
| E <sub>loc</sub>          | local efficiency                                 |
| L <sub>p</sub>            | shortest path length                             |
| DMN                       | default mode network                             |
| MoCA                      | Montreal Cognitive Assessment                    |
| AVLT                      | Rey Auditory Verbal Learning Test                |
| TMT                       | Trail Making Test                                |
| SCWT                      | Stroop Color and Word Test                       |
| SDMT                      | Symbolic Digital Modalities Testing              |
| TMT (B-A)                 | the difference between TMT-B and TMT-A           |
| WMHs                      | white matter hyperintensities                    |
| CI                        | cognitive impairment                             |
| AD                        | Alzheimer's disease                              |
| A $\beta$                 | amyloid-beta                                     |
| WM                        | white matter                                     |
| GMV                       | gray matter volume                               |
| VBM                       | voxel-based morphometry                          |
| MCI                       | mild cognitive impairment                        |
| SWI                       | Susceptibility-weighted imaging                  |
| CSF                       | cerebrospinal fluid                              |
| TIV                       | total intracranial volume                        |
| BC                        | betweenness centrality                           |
| AUC                       | area under the curve                             |
| ANOVA                     | one-way analysis of variance                     |
| LSD                       | least significant difference                     |
| PVS                       | enlarged perivascular spaces                     |
| OHE                       | overt hepatic encephalopathy                     |
| lvPPA                     | logopenic variant of primary progressive aphasia |
| FC                        | functional connectivity                          |
